# Supplementary material
Source: Royal Society of Chemistry journal article supplement (doi:10.1039/d6nr01603k)
Supplement: d6nr01603k1.pdf [file d6nr01603k1.pdf]

## Supplementary Information

### **Hollow-needle-like nanocarbon with inner wall discriminating chirality**

Jun Maruyama,\* Shohei Maruyama, Tsutomu Shinagawa, Yuko Takao, Akira Takatsuki, Noriko Yoshizawa,  
Masataka Inoue, Natsuki Imai, Koichi Matsuo, Fumito Tani, Hiroto Nishihara, Hideki Tanaka

## Decomposition of tetrakis(4-ethynylphenyl)methane

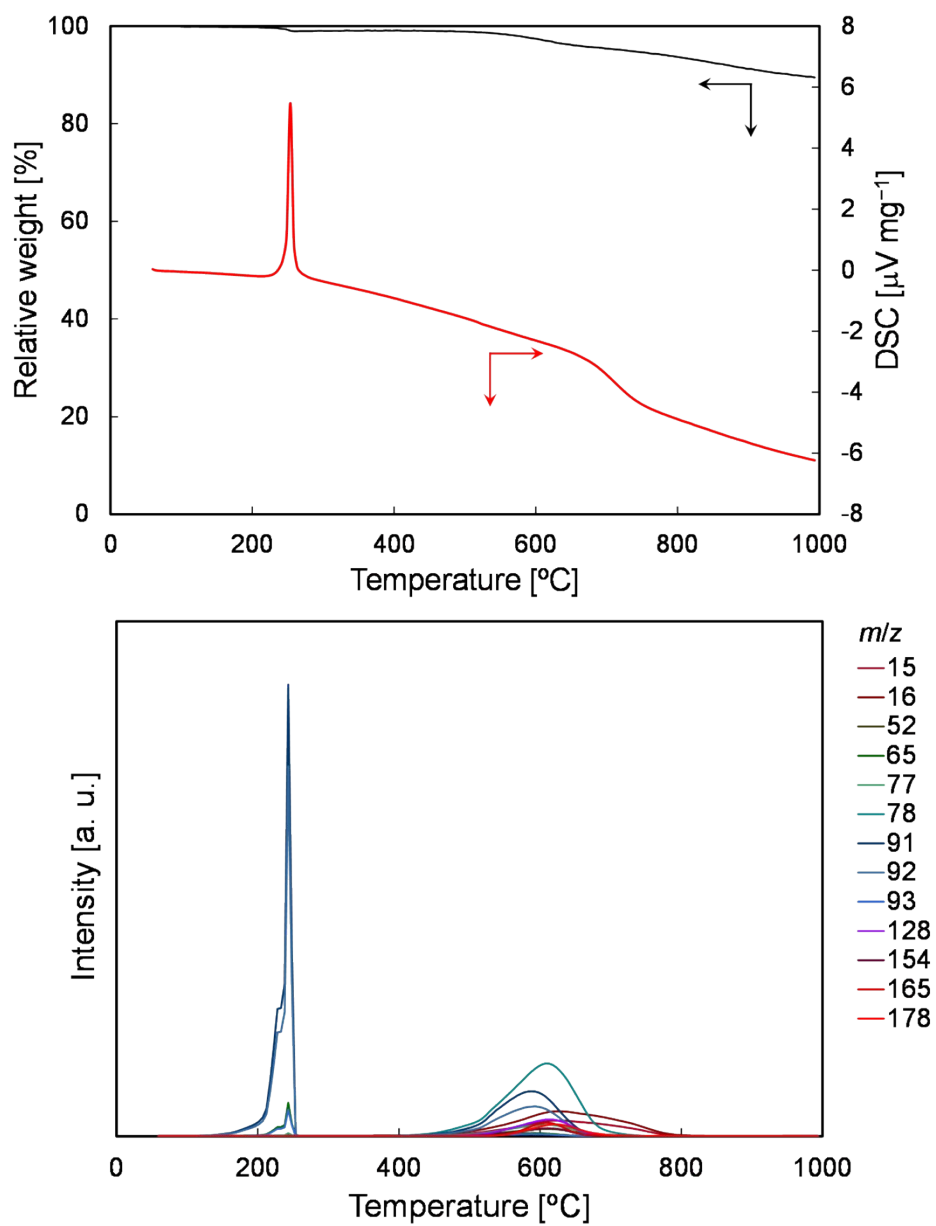

**Figure S1.** TG-DSC-MS profiles of tetrakis(4-ethynylphenyl)methane.

## Decomposition of (*R*)-BINOL

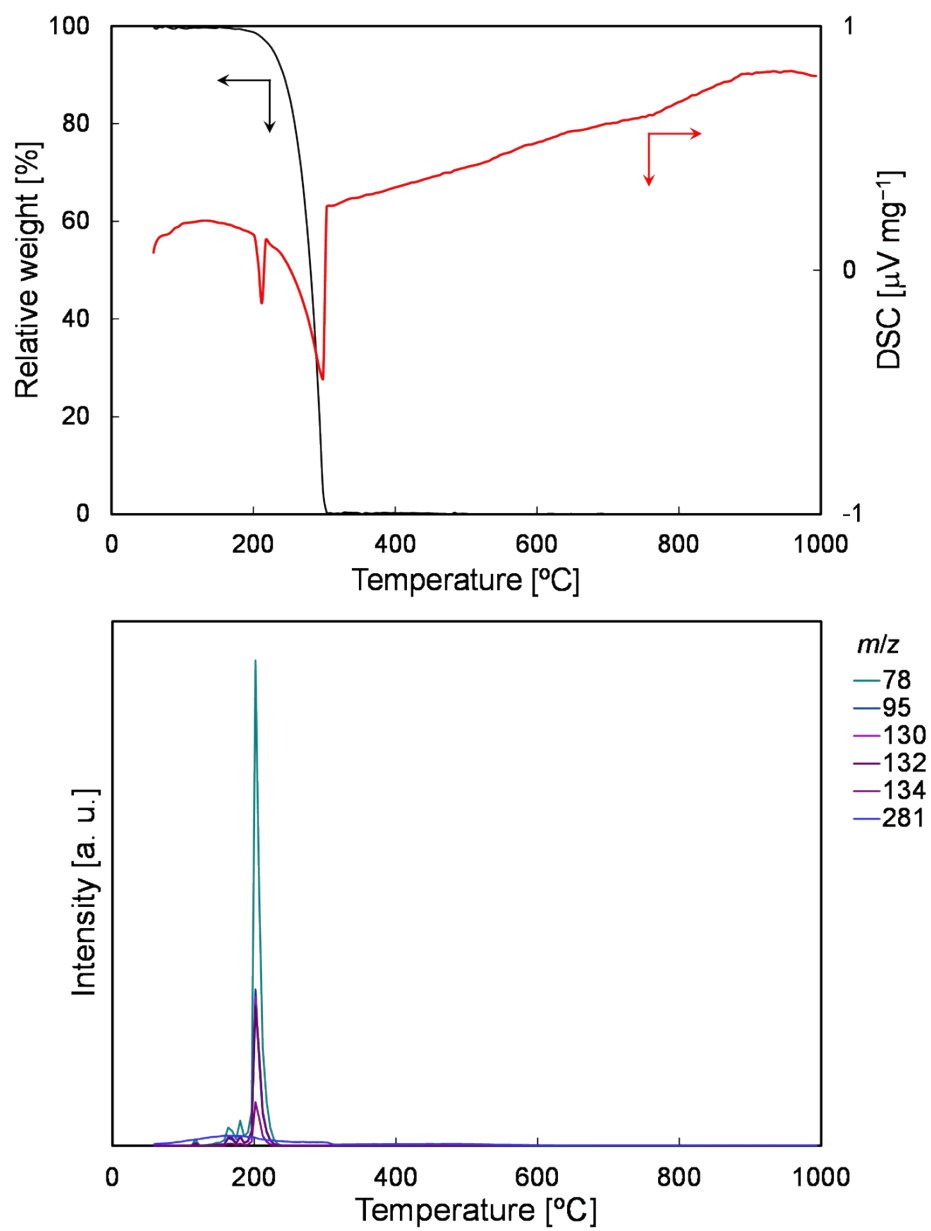

**Figure S2.** TG-DSC-MS profiles of (*R*)-BINOL.

## Decomposition of (*S*)-BINOL

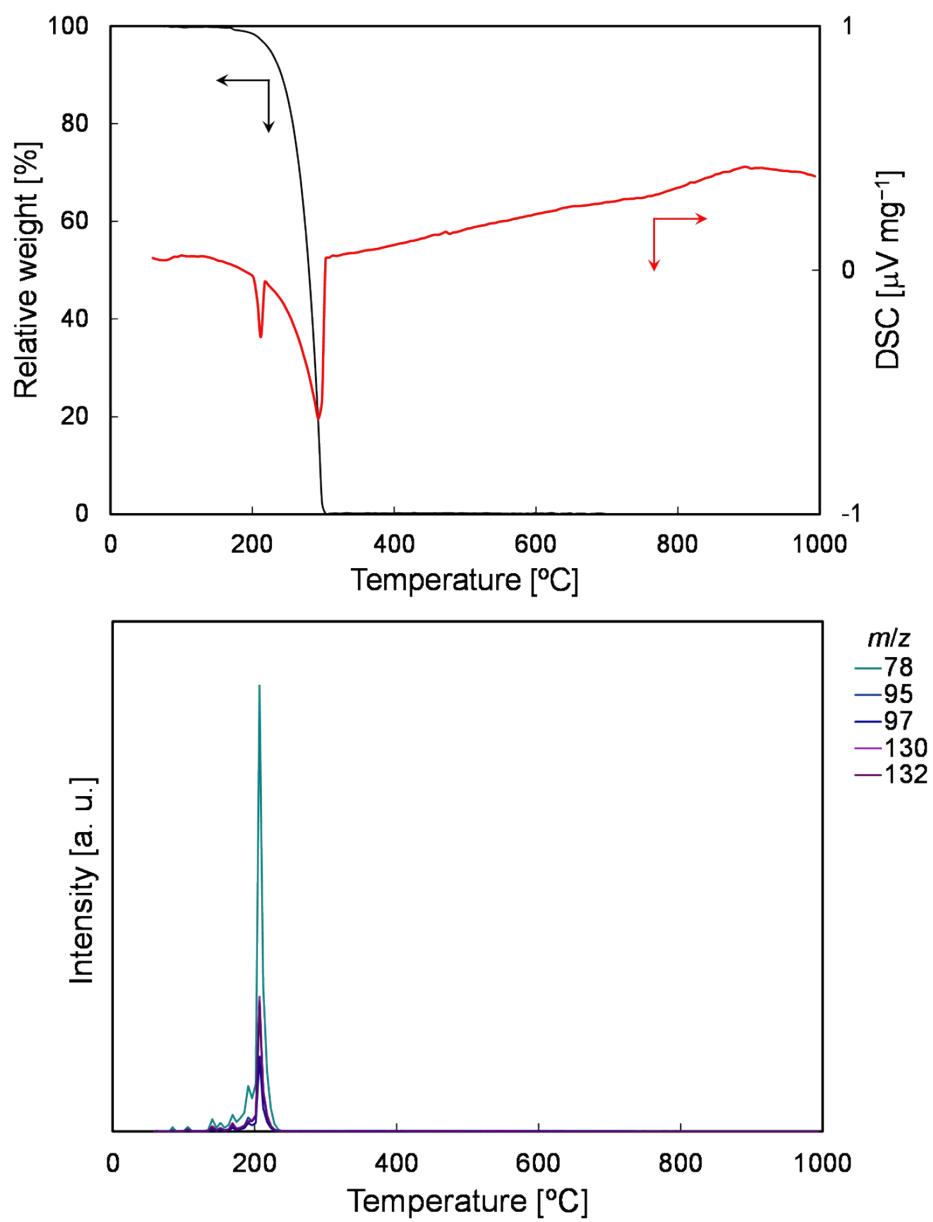

**Figure S3.** TG-DSC-MS profiles of (*S*)-BINOL.

## Sublimation of C<sub>60</sub>

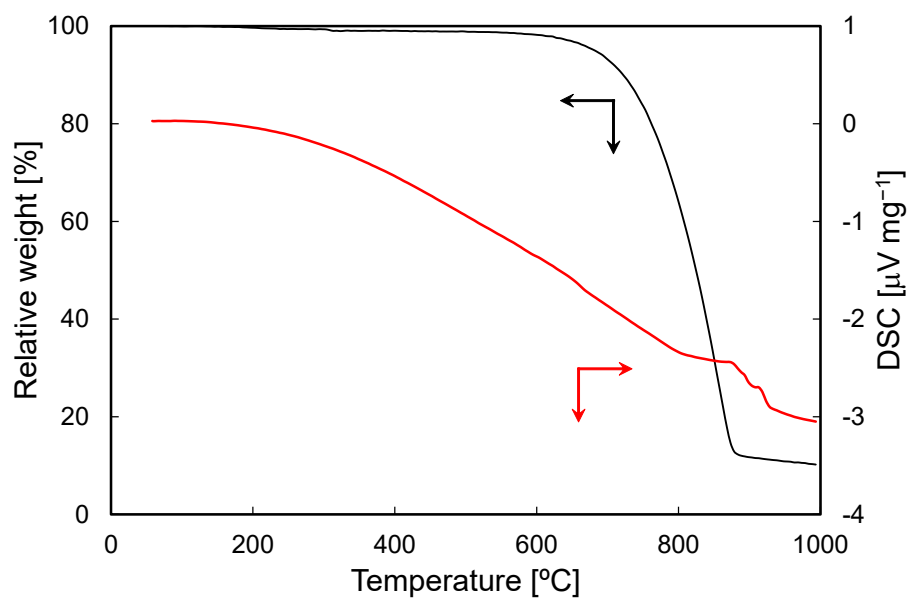

**Figure S4.** TG-DSC profiles of C<sub>60</sub>. The MS profile is omitted because of the deposition of the sublimed C<sub>60</sub> between TG and MS.

## Decomposition of TR

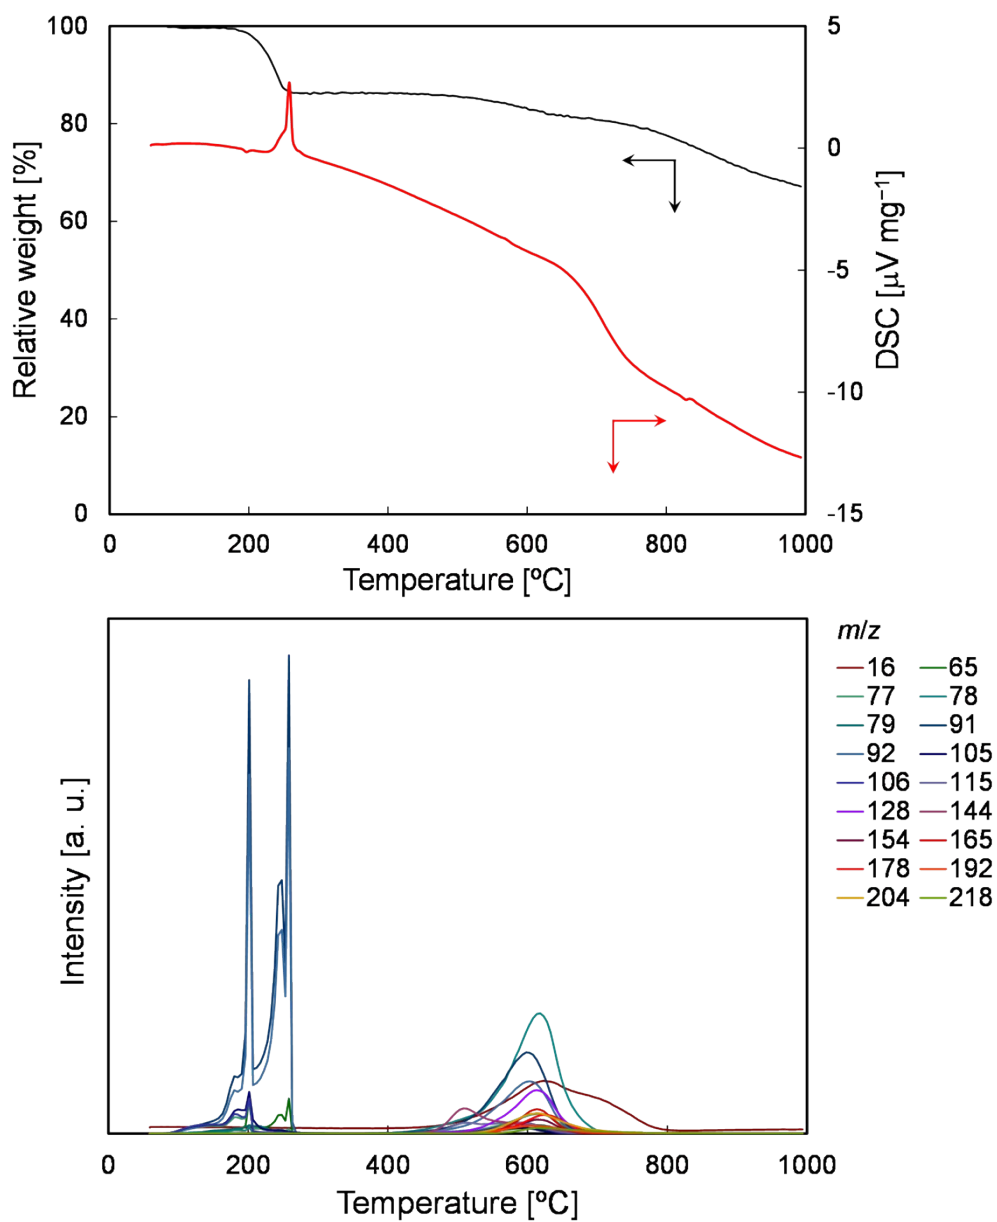

Figure S5. TG-DSC-MS profiles of TR.

## Decomposition of TS

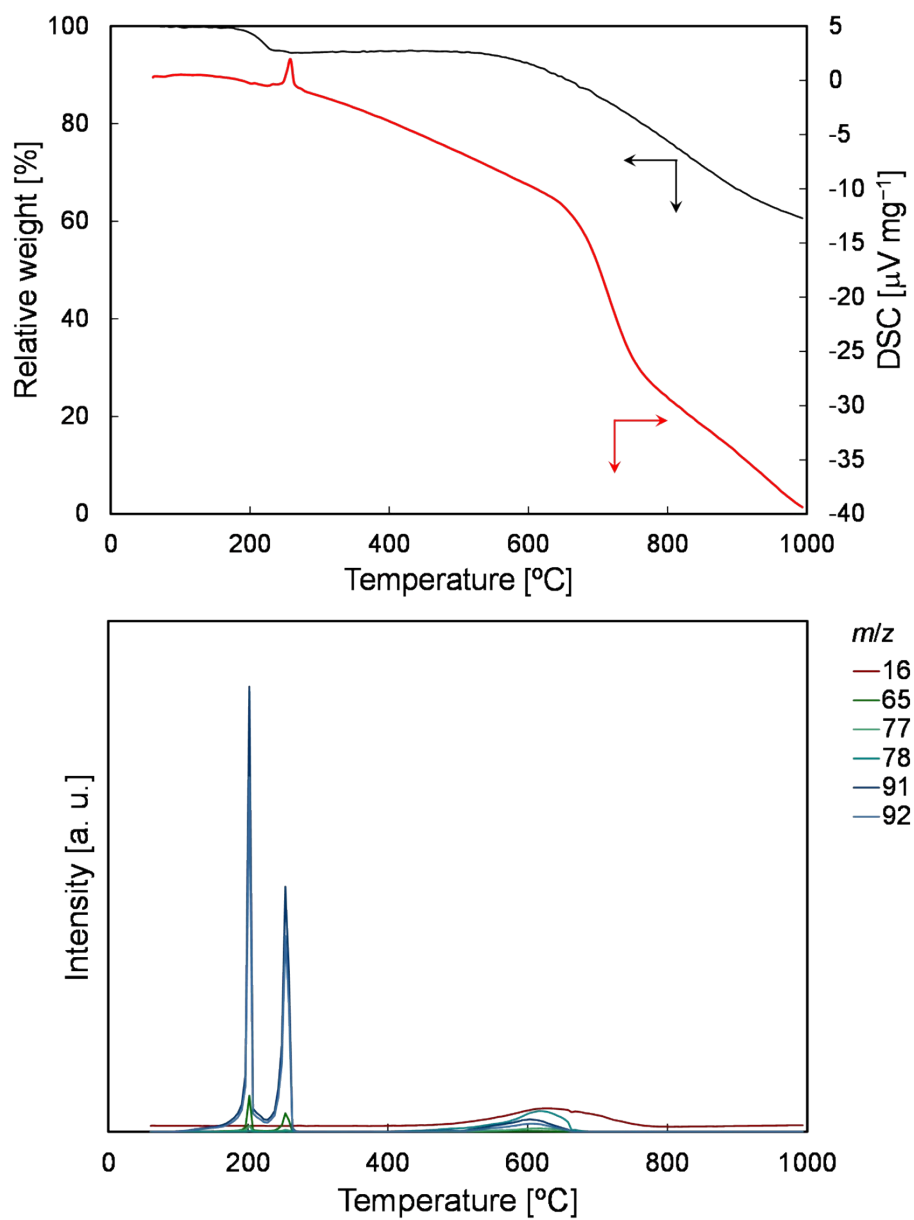

Figure S6. TG-DSC-MS profiles of TS.

## Decomposition of TF

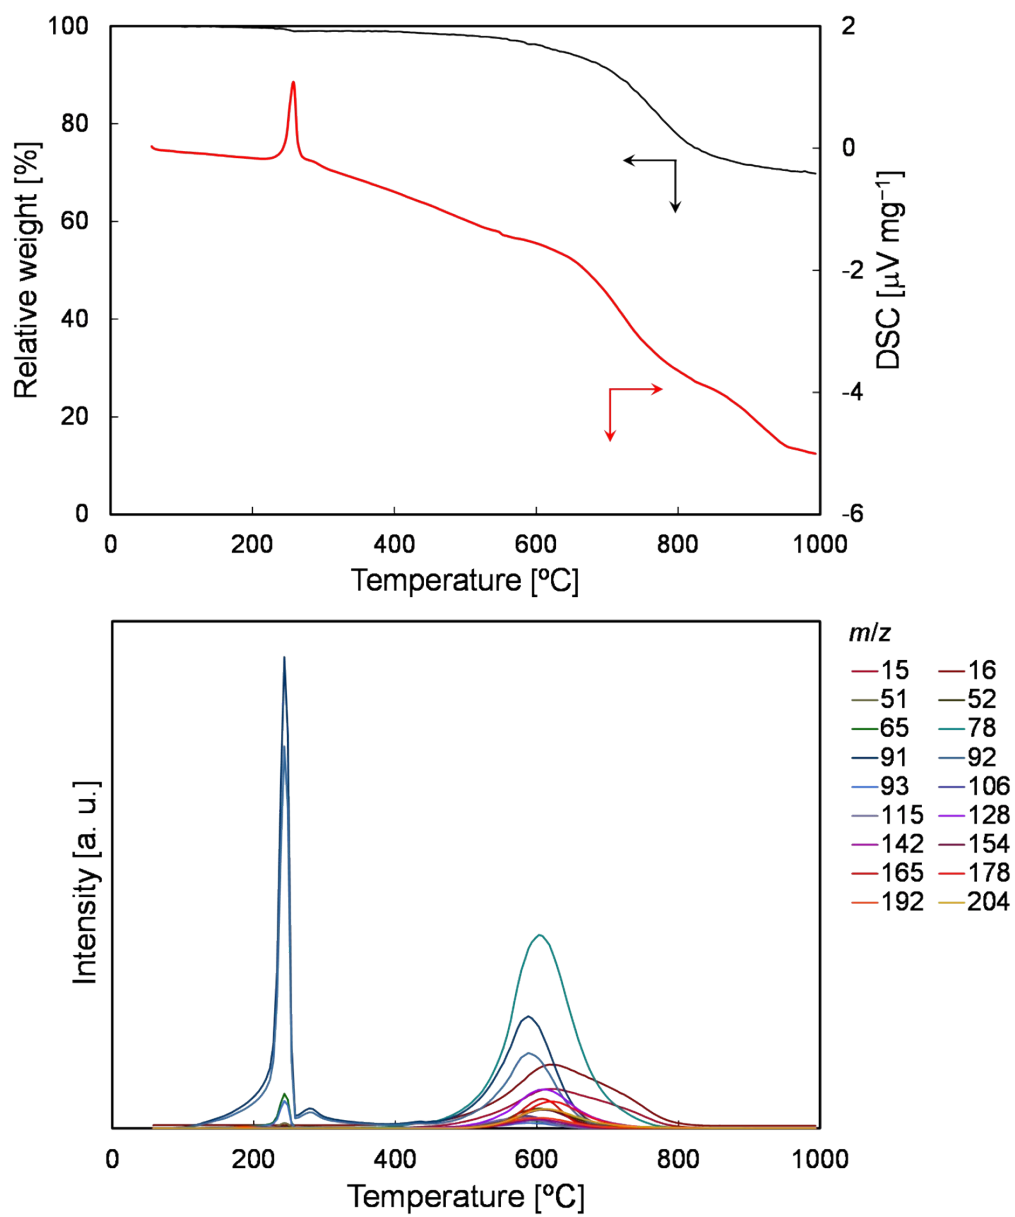

**Figure S7.** TG-DSC-MS profiles of TF.

## Decomposition of TFR

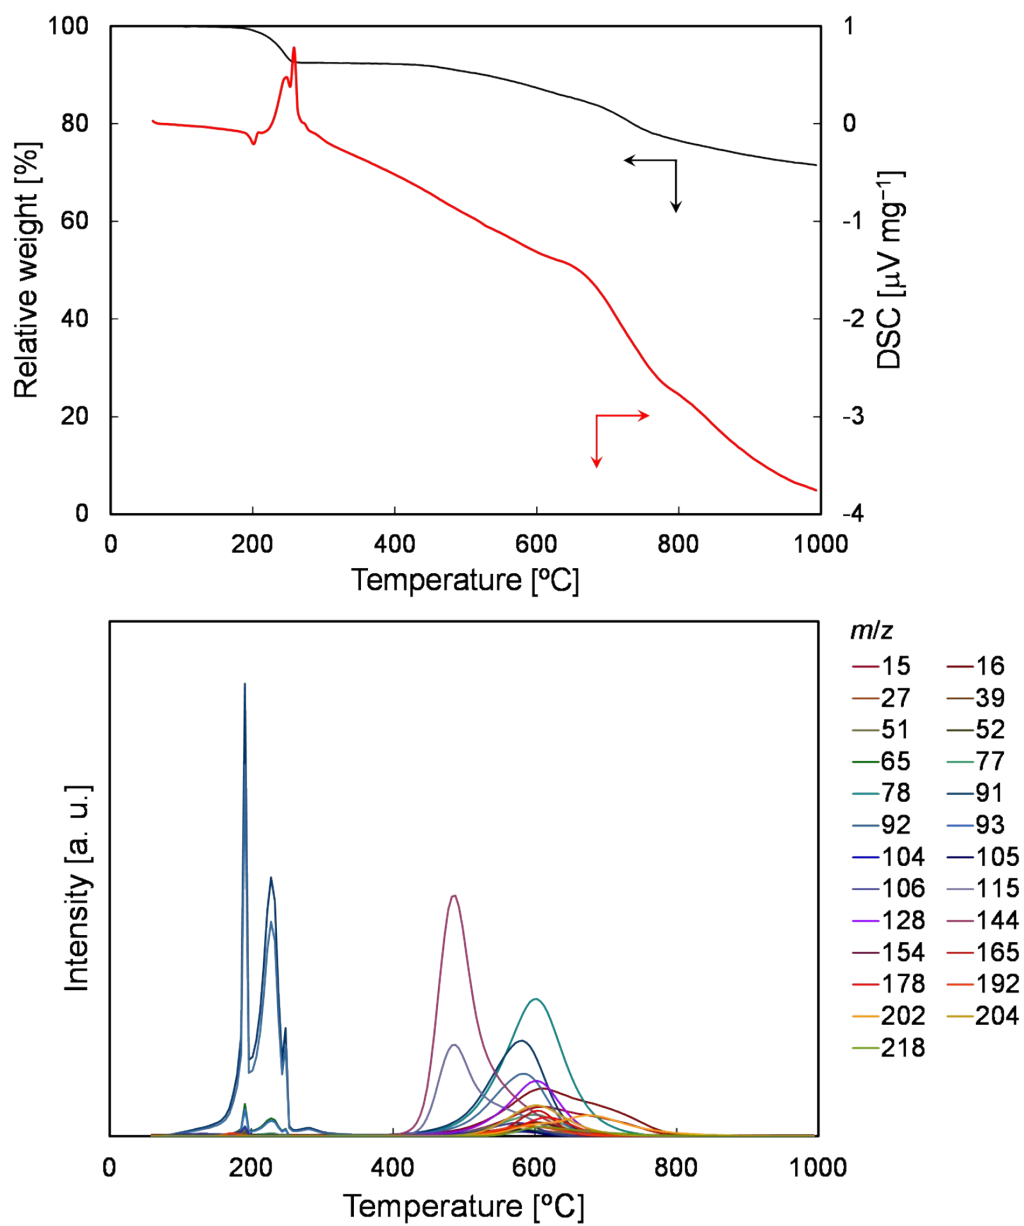

**Figure S8.** TG-DSC-MS profiles of TFR.

## Decomposition of TFS

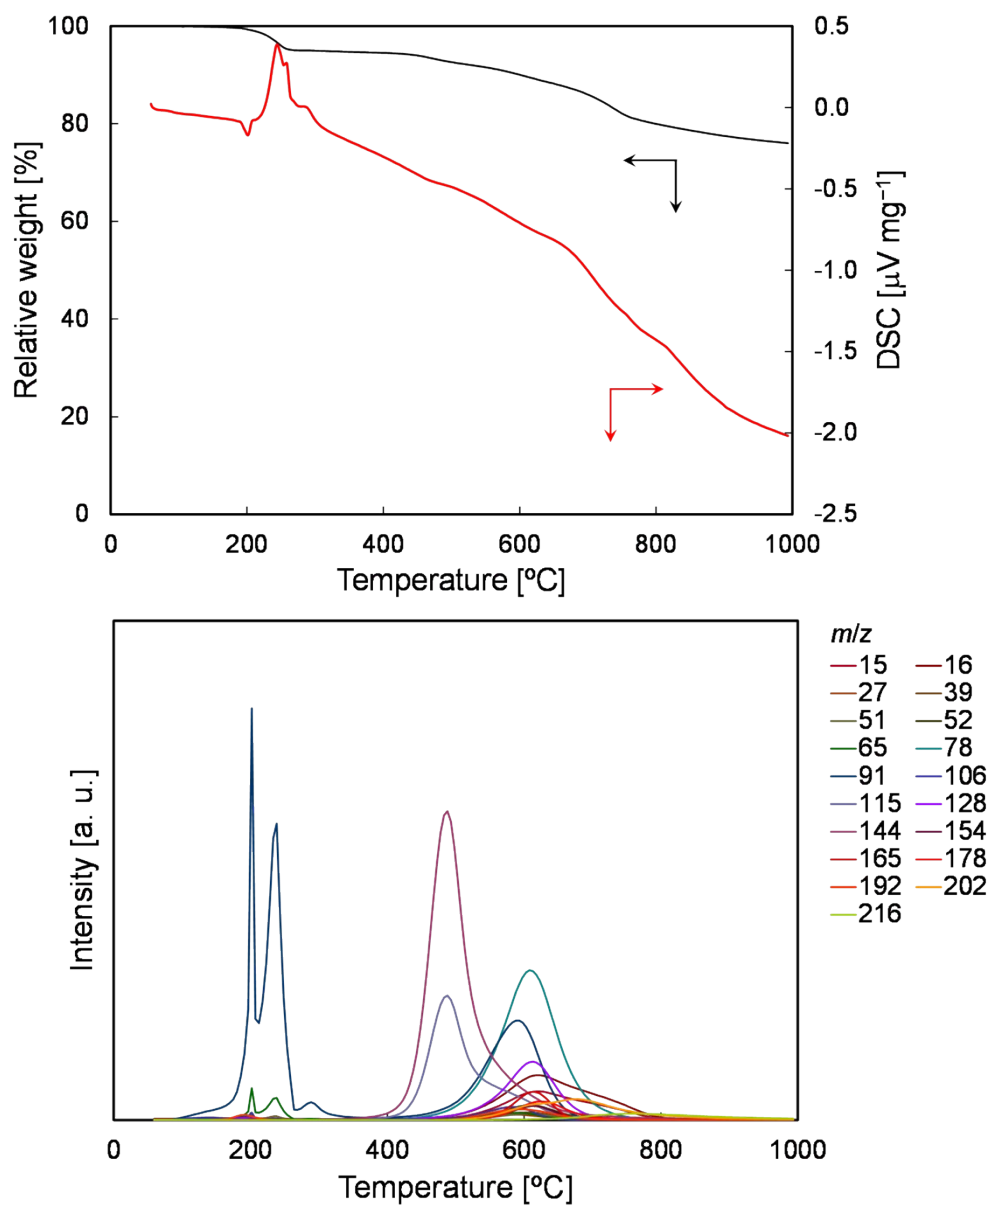

Figure S9. TG-DSC-MS profiles of TFS.

## Raman spectra

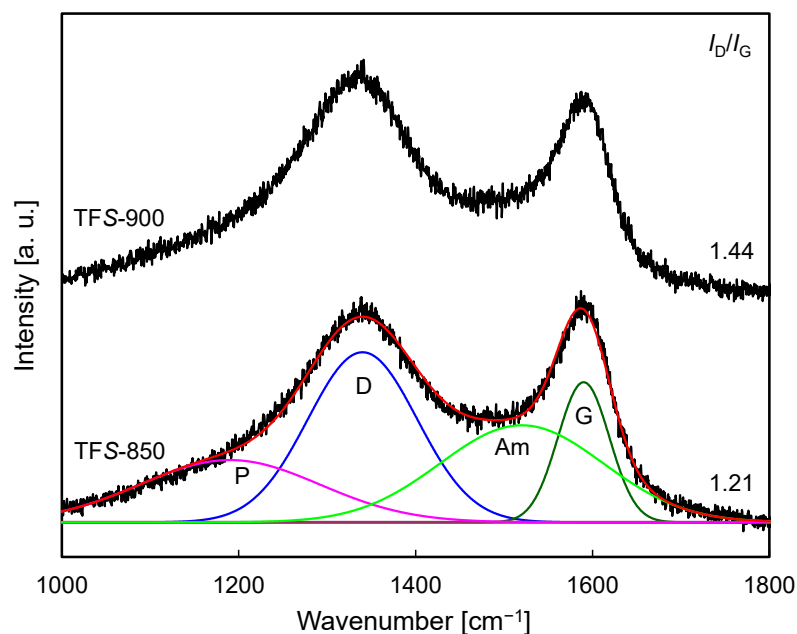

**Figure S10.** Raman spectra of TFS-850 and -900 formed on silica plates. The spectra are deconvoluted into four components: graphitic peak (G peak) at 1600–1580  $\text{cm}^{-1}$ , disorder peak (D peak) at 1355–1340  $\text{cm}^{-1}$ , a peak ascribed to amorphous carbon phase (Am peak) at 1525–1490  $\text{cm}^{-1}$ , and a peak ascribed to  $\text{sp}^3$ -bonded carbon atoms (P peak) at 1190–1150  $\text{cm}^{-1}$ .<sup>S1,S2</sup> The ratios of the peak areas are listed below in Table S1. The ratios of the intensities of the D peak to the G peak ( $I_D/I_G$ ) are also shown in the figure. Both spectra are those typically observed for amorphous carbon and similar except for the increase in the  $I_D/I_G$  value with an increase in the heat treatment temperature, which is often observed for amorphous carbon.<sup>S3-5</sup> It should be noted that the absence of the peak attributed to  $\text{C}_{60}$  in the spectrum of TFS-850 might be due to the limited amount of  $\text{C}_{60}$  embedded only on the inner surface of the hollow-needle-like nanocarbon.

**Table S1.** Ratios [%] of deconvoluted peak area for Raman spectra of TFS-850 and -900.

|         | G    | D    | Am   | P    |
|---------|------|------|------|------|
| TFS-850 | 14.0 | 34.9 | 30.5 | 20.6 |
| TFS-900 | 12.2 | 37.4 | 29.6 | 20.8 |

## Line defect on $C_{60}$ crystal nanorod surface as a potential chiral alignment

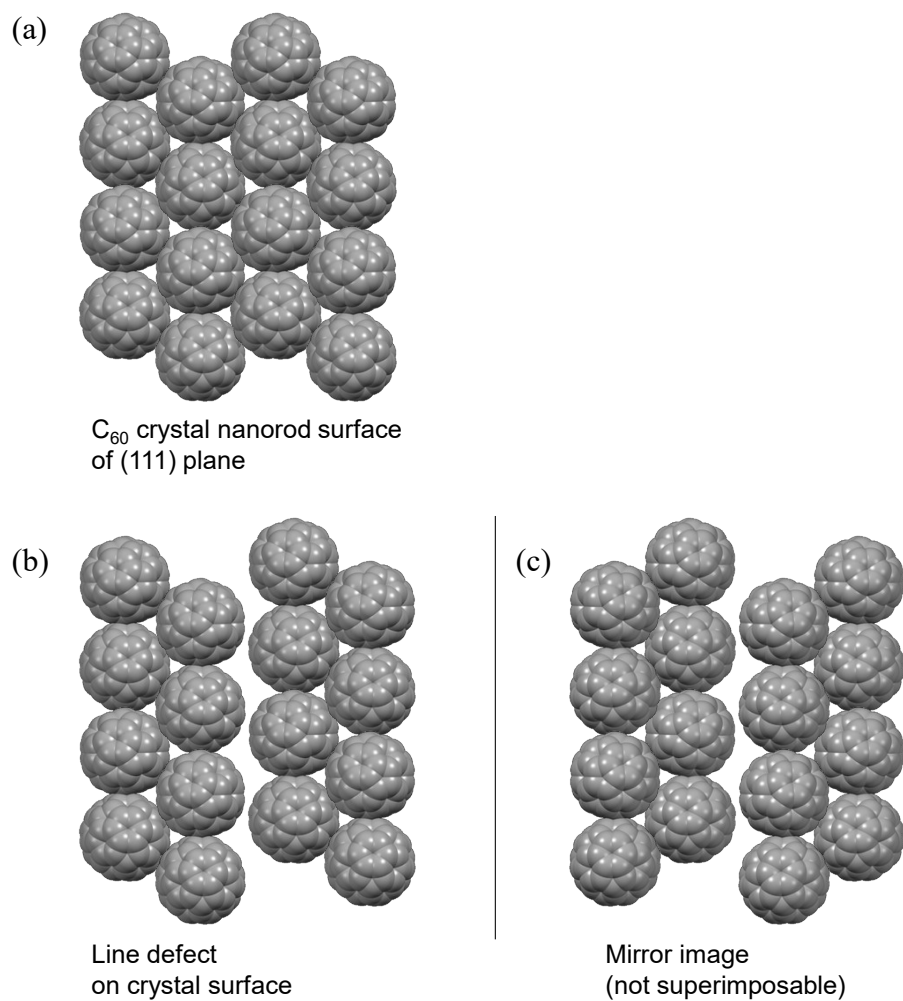

**Figure S11.**  $C_{60}$  alignments of (a) (111) plane of  $C_{60}$  crystal surface (b) that with line defect generated by gap and shift, and (c) its mirror image.

## Stable configuration of BINOL on model of line defect of C<sub>60</sub> crystal surface

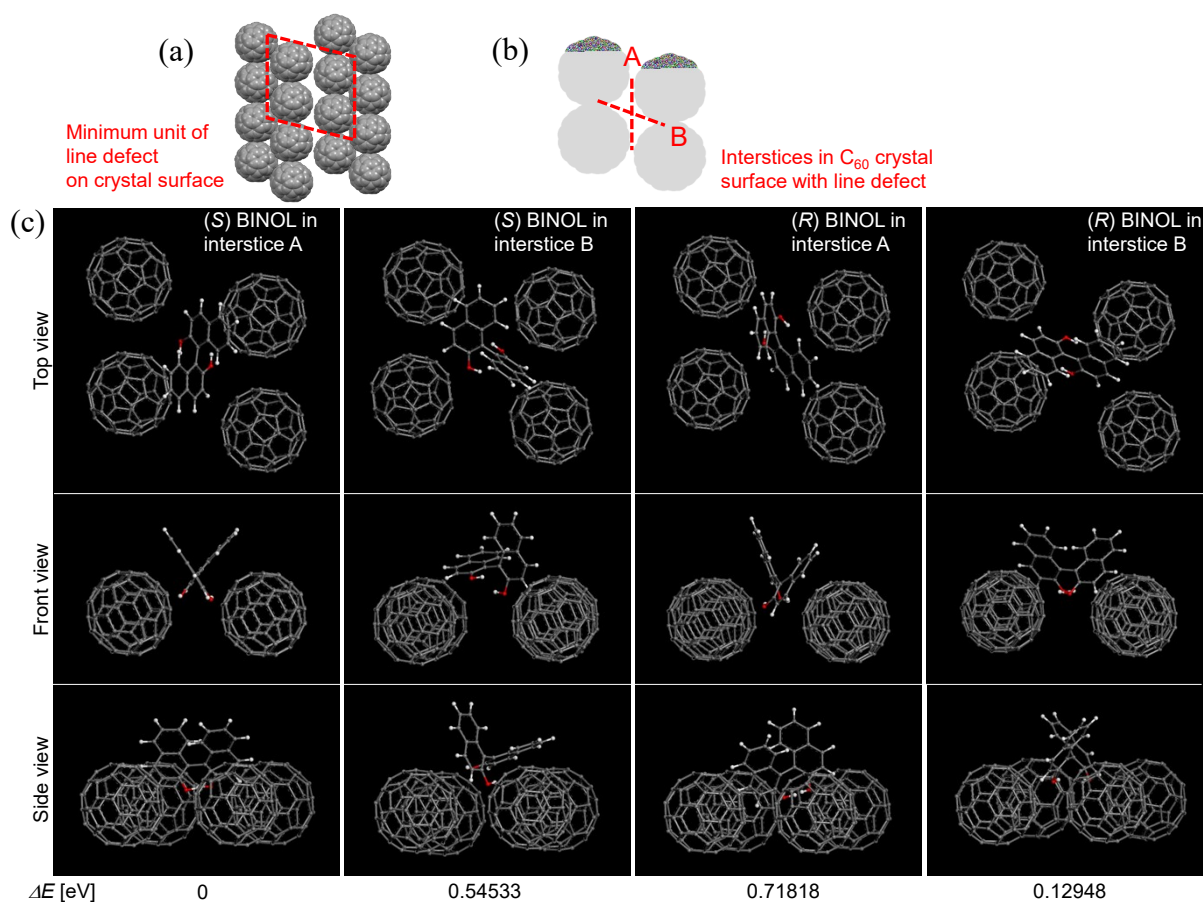

**Figure S12.** Schematic of (a) minimum unit of line defect on C<sub>60</sub> crystal surface, (b) most probable two interstices that accommodate BINOL molecule, and (c) results of DFT calculations. The potential energy differences ( $\Delta E$ ) obtained by subtracting the energy for the combination of (S)-BINOL and the interstice A (the lowest energy,  $-273682.08144$  eV) from those for the other combinations are shown. It should be noted that the most of the potential energy was derived from that for the four C<sub>60</sub> molecules with the gap and the shift ( $-248638.98646$  eV). The lowest energy obtained for (S)-BINOL indicates that the line defect model with the chiral surface C<sub>60</sub> alignment have a higher affinity for (S)- than (R)-BINOL.

## Chiral discrimination ability by alignment of $C_{60}$ on inner wall surface

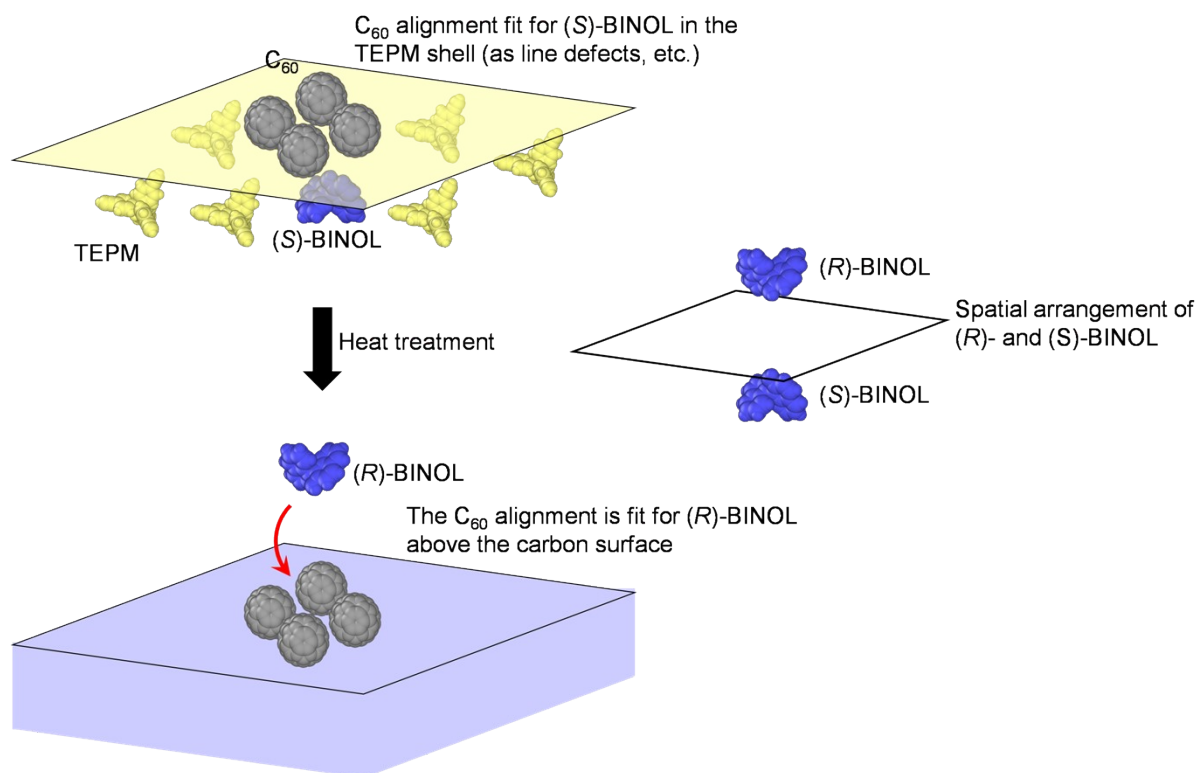

**Figure S13.** Schematic of alignment of  $C_{60}$  in precursor with TEPM,  $(S)$ -BINOL, and inner wall surface of carbon shell after heat treatment around 800–850 °C to remove  $C_{60}$  core by sublimation. In the upper figure, four  $C_{60}$  molecules are drawn as an example. The  $C_{60}$  core above the yellow plane is omitted for simplification.

## CD spectra of hollow-needle-like nanocarbon

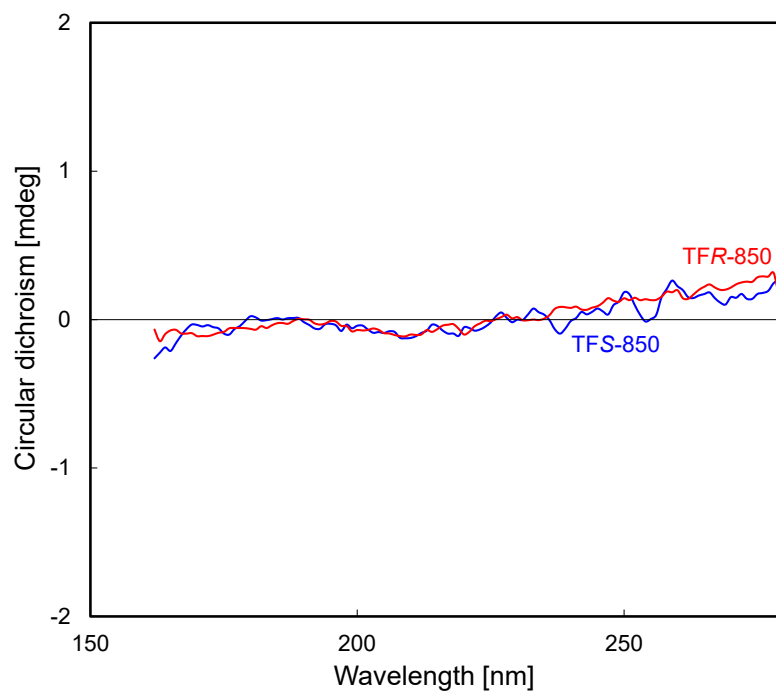

**Figure S14.** CD spectra of TFR- and TFS-850. The wavelength range was set according to our previous study.<sup>16</sup>

## References

- S1 A. Sadezky, H. Muckenhuber, H. Grothe, R. Niessner and U. Pöschl, *Carbon*, 2005, **43**, 1731–1742.
- S2 F. Jaouen, F. Charreter and J. P. Dodelet, *J. Electrochem. Soc.*, 2006, **153**, A689–A698.
- S3 R. Yuan, Y. Guo, I. Gurgan, N. Siddique, Y. -S. Li, S. Jang, G. A. Noh and S. H. Kim, *Carbon*, 2025, **238**, 120214.
- S4 T. Kaplas, A. Matikainen, T. Nuutinen, S. Suvanto, P. Vahimaa and Y. Svirko, *Sci. Rep.*, 2017, **7**, 8561.
- S5 I. Karacan and L. Erzurumluoğlu, *Fibers Polym.*, 2015, **16**, 961–974.
